# Supplementary material for: Conformational specificity of the C4F6 SOD1 antibody; low frequency of reactivity in sporadic ALS cases
Source: PubMed Central journal article supplement (PMC4035506; doi:10.1186/2051-5960-2-55), 2014-05-14
Supplement: 40478_2014_128_MOESM3_ESM.pdf [file 40478_2014_128_MOESM3_ESM.pdf]

### Electronic Supplementary Material 3

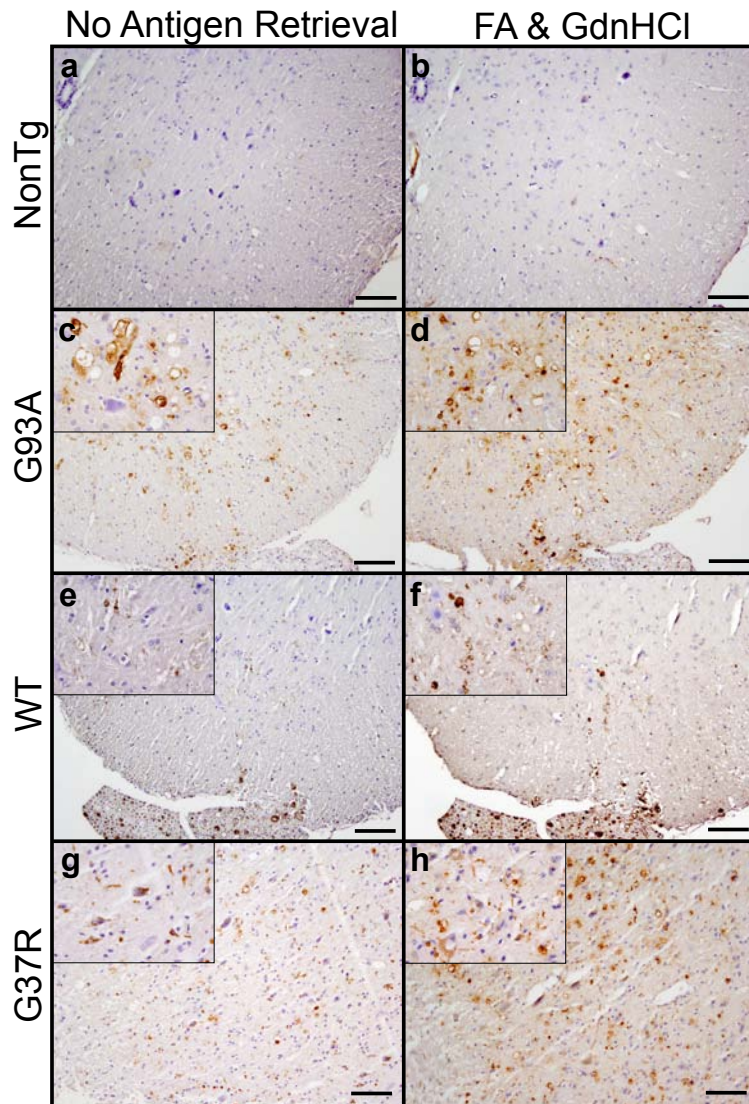

**ESM3** Antigen-retrieval impacts SEDI immunoreactivity to hSOD1 in transgenic mouse spinal cord tissues. Tissue sections from mice overexpressing WT, G93A, and G37R, or non-transgenic mice for controls, were stained with SEDI following either no antigen retrieval or formic acid and 6M guanidine hydrochloride (FA & GdnHCl). All tissues from mice expressing mutant hSOD1 (G93A and G37R) were harvested from paralyzed mice. The WT hSOD1 tissue was from mice ~18 months of age. *Scale bar* 100  $\mu$ m
